# Supplementary material
Source: Copernicus journal article supplement (doi:10.5194/egusphere-2026-2198)
Supplement: Supplementary file 1 [file egusphere-2026-2198-supplement.pdf]

1 Supporting Information for

2

3 **East Asian Anthropogenic Aerosols Strongly Influence Past**  
4 **and Present Southern African Hydroclimate and Ecosystem**  
5 **Changes**

6 Bosi Sheng<sup>1,2,\*</sup>, Massimo A. Bollasina<sup>2</sup>, Alexandre S. Gagnon<sup>3</sup>, Laura J. Wilcox<sup>4</sup>, Thomas  
7 P. S. Reynolds<sup>1</sup>, Christopher T. S. Beckett<sup>1</sup>, Haolin Wang<sup>2</sup>, Qingxiang Li<sup>5</sup>, Pierre Nabat<sup>6</sup>,  
8 Robert J. Allen<sup>7</sup>, Bjørn H. Samset<sup>8</sup>, Joonas Merikanto<sup>9</sup>, Geeta G. Persad<sup>10</sup>, Toshihiko  
9 Takemura<sup>11</sup>, Kostas Tsigaridis<sup>12,13</sup>, Sharar Ahmadi<sup>4</sup>, Maxwell T Elling<sup>14,15</sup>, Knut von  
10 Salzen<sup>16,17</sup>, Daniel M Westervelt<sup>18</sup>, Naga Oshima<sup>19</sup>, Tsuyoshi Koshiro<sup>19</sup>

11 <sup>1</sup> Institute for Infrastructure and Environment, School of Engineering, University of Edinburgh, UK

12 <sup>2</sup> School of GeoSciences, University of Edinburgh, UK

13 <sup>3</sup> School of Biological and Environmental Sciences, Liverpool John Moores University, UK

14 <sup>4</sup> National Centre for Atmospheric Science, Department of Meteorology, University of Reading, UK

15 <sup>5</sup> School of Atmospheric Sciences, Sun Yat-Sen University, and Key Laboratory of Tropical Atmosphere-  
16 Ocean System, Ministry of Education, China

17 <sup>6</sup> Météo-France, CNRS, Univ. Toulouse, CNRM, Toulouse, France

18 <sup>7</sup> Department of Earth and Planetary Sciences, University of California Riverside, Riverside, CA, USA

19 <sup>8</sup> CICERO Center for International Climate Research, Oslo, Norway

20 <sup>9</sup> Finnish Meteorological Institute, Climate Research, Helsinki, Finland

21 <sup>10</sup> Department of Geological Sciences, The University of Texas at Austin, Austin, TX, USA

22 <sup>11</sup> Research Institute for Applied Mechanics, Kyushu University, Fukuoka, Japan

23 <sup>12</sup> Center for Climate Systems Research, Columbia University, New York, NY, USA

24 <sup>13</sup> NASA Goddard Institute of Space Studies, New York, NY, USA

25 <sup>14</sup> Department of Atmospheric and Oceanic Sciences, University of Colorado Boulder, Boulder, CO, USA

26 <sup>15</sup> Cooperative Institute for Research in Environmental Sciences, University of Colorado Boulder, Boulder,  
27 CO, USA

28 <sup>16</sup> Canadian Centre for Climate Modelling and Analysis, Environment and Climate Change Canada, Victoria,  
29 BC, Canada

30 <sup>17</sup> Department of Atmospheric and Climate Science, University of Washington, Seattle, WA, USA

31 <sup>18</sup> Lamont-Doherty Earth Observatory, Columbia Climate School, New York, NY, USA

32 <sup>19</sup> Meteorological Research Institute, Japan Meteorological Agency, Ibaraki, Japan

33

34

35 Correspondence: Bosi Sheng ([bsheng@ed.ac.uk](mailto:bsheng@ed.ac.uk))

36

37

38

39

**This PDF file includes:**

Supporting Table S1 to S3 and Figure S1 to S7

40 **Table S1.** CMIP6 models included in this study that performed the hist-All, hist-GHG, and hist-AER  
41 simulations, with corresponding ensemble sizes and horizontal resolution.

| Model name      | Ensembles | Horizontal resolution             |
|-----------------|-----------|-----------------------------------|
| ACCESS-CM2      | 3         | $1.3^{\circ} \times 1.9^{\circ}$  |
| ACCESS-ESM1-5   | 3         | $1.3^{\circ} \times 1.9^{\circ}$  |
| CNRM-CM6-1      | 10        | $1.4^{\circ} \times 1.4^{\circ}$  |
| E3SM-2-0        | 5         | $1.0^{\circ} \times 1.0^{\circ}$  |
| FGOALS-g3       | 3         | $2.0^{\circ} \times 2.25^{\circ}$ |
| HadGEM3-GC31-LL | 10        | $1.3^{\circ} \times 1.9^{\circ}$  |
| IPSL-CM6A-LR    | 10        | $1.3^{\circ} \times 2.5^{\circ}$  |
| MIROC6          | 10        | $1.4^{\circ} \times 1.4^{\circ}$  |
| MRI-ESM2-0      | 5         | $1.1^{\circ} \times 1.1^{\circ}$  |
| NorESM2-LM      | 3         | $1.9^{\circ} \times 2.5^{\circ}$  |

42

43 **Table S2.** List of PDRMIP models from CMIP5 used in this study.

| Model name      | Horizontal resolution        | Aerosol setting      |
|-----------------|------------------------------|----------------------|
| GISS-E2-R       | $2.0^\circ \times 2.5^\circ$ | Fixed concentrations |
| HadGEM3         | $1.3^\circ \times 1.9^\circ$ | Fixed concentrations |
| IPSL-CM5A       | $1.9^\circ \times 3.8^\circ$ | Fixed concentrations |
| MIROC-SPRINTARS | $1.4^\circ \times 1.4^\circ$ | HTAP2 Emissions      |
| NCAR-CESM1-CAM4 | $1.9^\circ \times 2.5^\circ$ | Fixed concentrations |
| NCAR-CESM1-CAM5 | $1.9^\circ \times 2.5^\circ$ | Emissions            |
| NorESM1-M       | $1.9^\circ \times 2.5^\circ$ | Fixed concentrations |

44

45 **Table S3.** List of RAMIP models used in this study.

| Model name        | Ensembles | Horizontal resolution | Data source |
|-------------------|-----------|-----------------------|-------------|
| CanESM5-1         | 10        | 2.8° × 2.8°           | [1]         |
| CESM2             | 10        | 1.0° × 1.3°           | [2]         |
| CNRM-ESM2-1       | 10        | 1.4° × 1.4°           | [3]         |
| EC-Earth3-AerChem | 10        | 0.7° × 0.7°           | [4]         |
| GISS-E2-1-G       | 10        | 2.0° × 2.5°           | [5]         |
| MIROC6            | 10        | 1.4° × 1.4°           | [6]         |
| MRI-ESM2-0        | 10        | 1.1° × 1.1°           | [7]         |
| NorESM2-LM        | 10        | 2.0° × 2.5°           | [8]         |
| SPEAR             | 10        | 1.0° × 1.3°           | [9]         |
| UKESM1-0-LL       | 10        | 1.3° × 1.9°           | [10]        |

46

- 47 [1] Fraser-Leach, L.; Kushner, P.; von Salzen, K.; Swart, N. (2025): CanESM5-1 output prepared for the  
 48 Regional Aerosol Model Intercomparison Project (RAMIP). NERC EDS Centre for Environmental  
 49 Data Analysis, date of citation. <http://catalogue.ceda.ac.uk/uuid/a33a7cc2d0a84e27a78b24d70fe257e4>
- 50 [2] Allen, R. (2026): CESM2 output prepared for the Regional Aerosol Model Intercomparison Project  
 51 (RAMIP). NERC EDS Centre for Environmental Data Analysis, *date of citation*.  
 52 <http://catalogue.ceda.ac.uk/uuid/b7c87e4dafcc486ba1eca2abac752abf>
- 53 [3] Nabat, P. (9999): CNRM-ESM2-1 output prepared for the Regional Aerosol Model Intercomparison  
 54 Project (RAMIP). NERC EDS Centre for Environmental Data Analysis, date of citation.  
 55 <http://catalogue.ceda.ac.uk/uuid/5477e60b209a4e169ca60d7f01a017eb>
- 56 [4] O'Donnell, D.; Makkonen, R.; Merikanto, J. (2025): EC-Earth3-AerChem output prepared for the  
 57 Regional Aerosol Model Intercomparison Project (RAMIP). NERC EDS Centre for Environmental  
 58 Data Analysis, *date of citation*.  
 59 <http://catalogue.ceda.ac.uk/uuid/d581329422fb455ab9af0ea96c04d266>
- 60 [5] Data to be released.
- 61 [6] Takemura, T. (9999): MIROC6 output prepared for the Regional Aerosol Model Intercomparison  
 62 Project (RAMIP). NERC EDS Centre for Environmental Data Analysis, date of citation.  
 63 <http://catalogue.ceda.ac.uk/uuid/7fbe5be720a34d4785cc7e3bb9df4641>

- 64 [7] Oshima, N.; Koshiro, T. (2025): MRI-ESM2-0 output prepared for the Regional Aerosol Model  
65 Intercomparison Project (RAMIP). NERC EDS Centre for Environmental Data Analysis, date of  
66 citation. <http://catalogue.ceda.ac.uk/uuid/e8678aaf39144d8cb10cd02e8a562101>
- 67 [8] Lewinschal, A. (2025): NorESM2-LM output prepared for the Regional Aerosol Model  
68 Intercomparison Project (RAMIP). NERC EDS Centre for Environmental Data Analysis, *date of*  
69 *citation*.  
70 <http://catalogue.ceda.ac.uk/uuid/44100d99d120487284d7b778dbc76bdf>
- 71 [9] Data to be released.
- 72 [10] Rumbold, S.; Keeble, J.; Wilcox, L.; Ahmadi, S.; Griffiths, P.; Lister, G.; Predoi, V. (2026): UKESM1-  
73 0-LL output prepared for the Regional Aerosol Model Intercomparison Project (RAMIP). NERC EDS  
74 Centre for Environmental Data Analysis, date of citation.  
75 <http://catalogue.ceda.ac.uk/uuid/63233813672245a2ba3c6de90c4cfaec>  
76

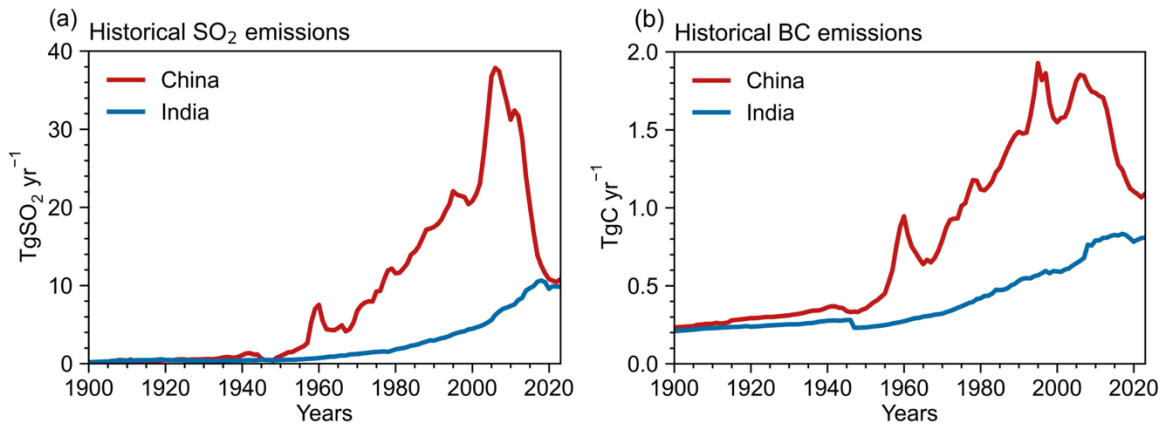

77

78 **Figure S1.** Trends in annual anthropogenic emissions of (a) sulfur dioxide (SO<sub>2</sub>) and (b) black carbon (BC)  
 79 over China and India over 1900–2023, based on the CEDS inventory. SO<sub>2</sub> emissions over China peak in the  
 80 mid-2000s (around 2005–2007) before declining sharply.

81

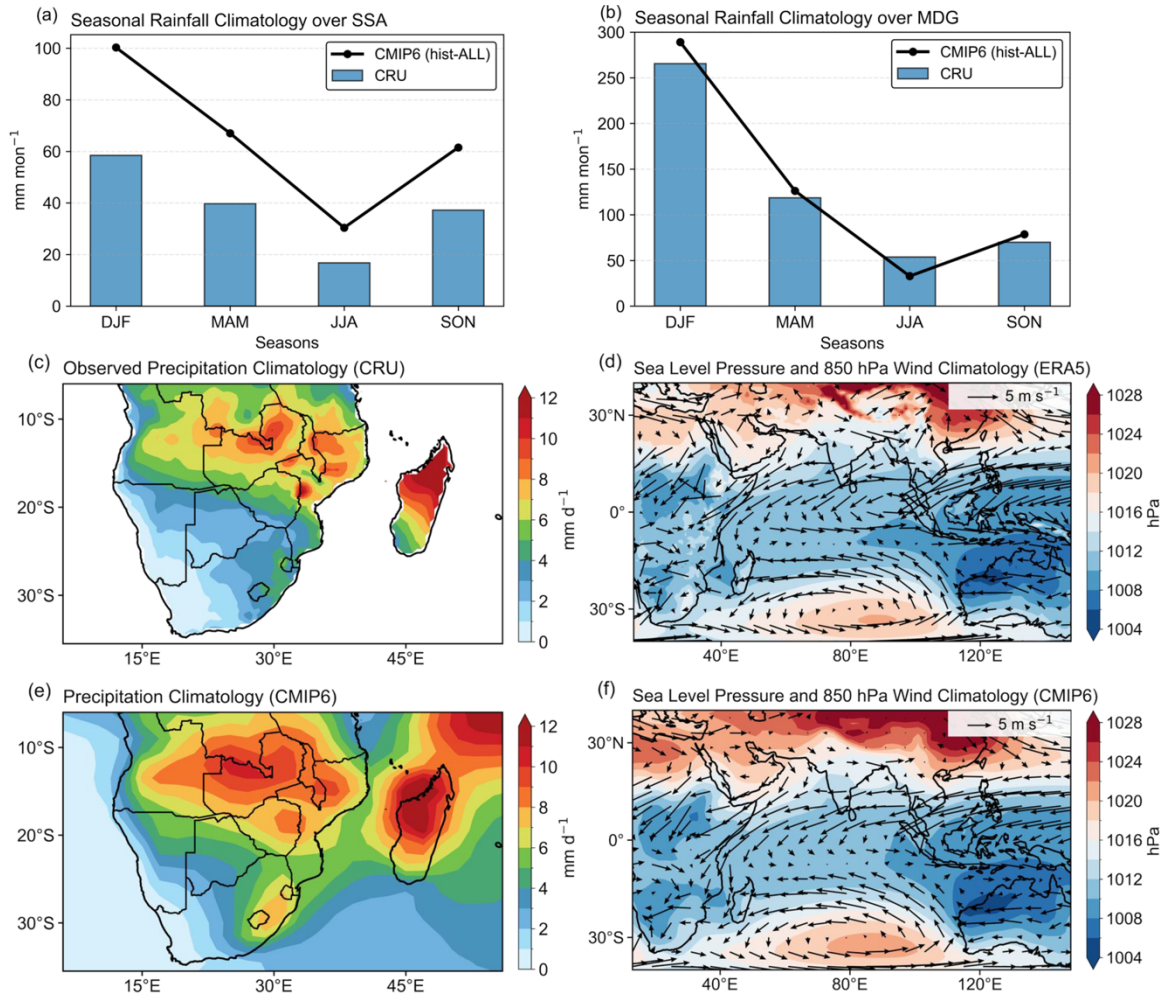

82

83 **Figure S2.** The DJF precipitation climatology (1961–1990) over (a) SSA and (b) MDG from CMIP6 hist-  
 84 All simulations and CRU observations. Spatial distribution of the DJF climatological mean (1961–1990): (c)  
 85 precipitation (CRU); (d) mean sea level pressure (shading) and 850 hPa winds (vectors) (ERA5); (e)  
 86 precipitation (CMIP6 hist-All MMM); (f) mean sea level pressure (shading) and 850 hPa winds (vectors)  
 87 (CMIP6 hist-All MMM).

88

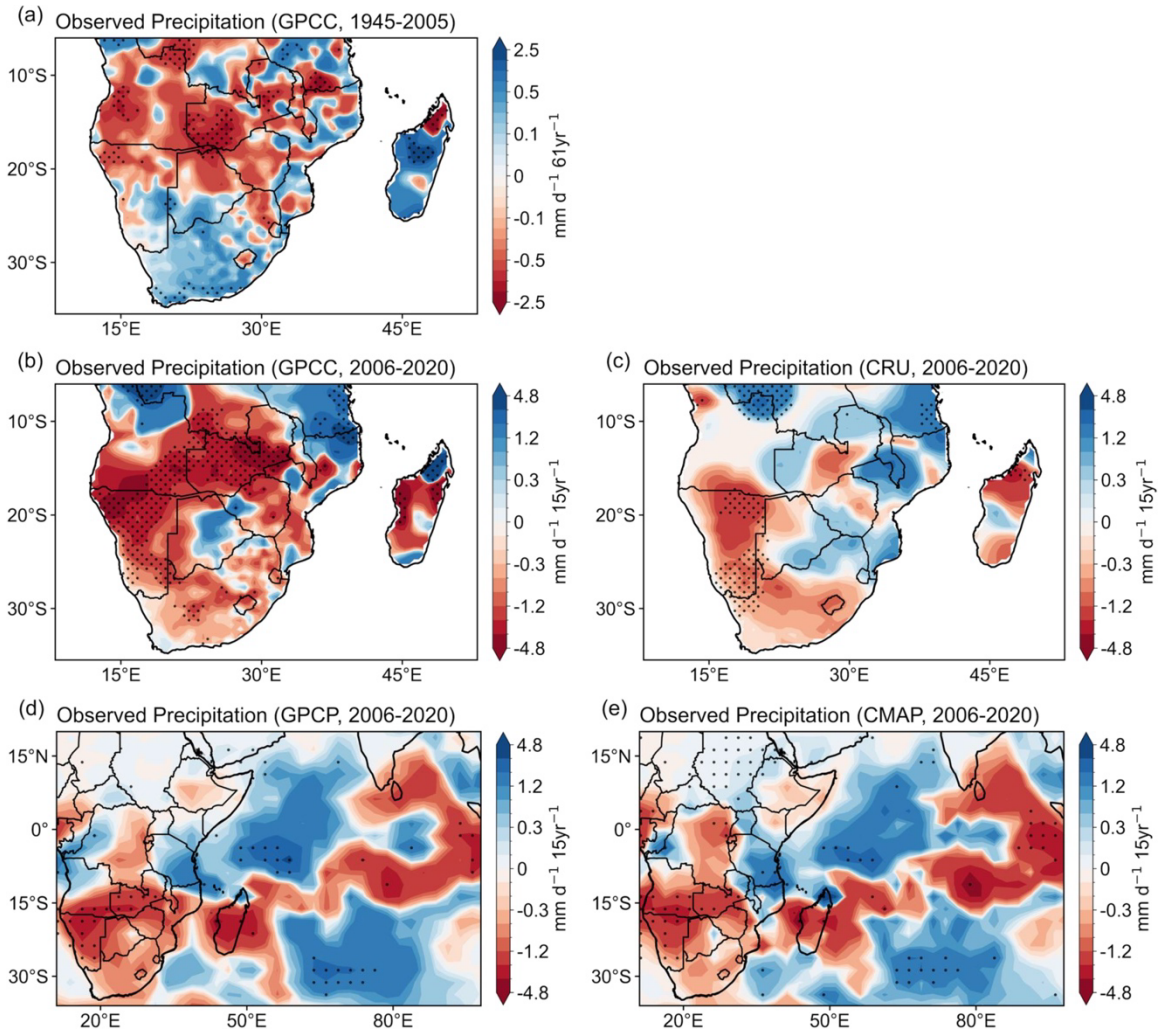

89

90 **Figure S3.** Spatial distribution of linear trends in DJF precipitation derived from (a) GPCC for 1945–2005,

91 (b) GPCC for 2006–2020, (c) CRU for 2006–2020, (d) GPCP for 2006–2020, and (e) CMAP for 2006–2020.

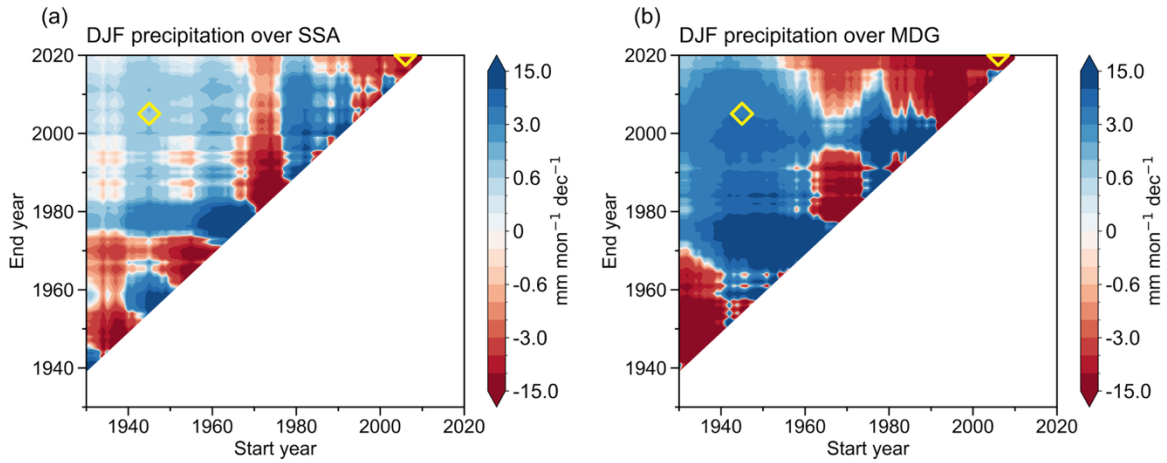

92

93 **Figure S4.** Observed DJF precipitation trends over (a) SSA and (b) MDG as a function of start and end years  
 94 during the twentieth century, based on CRU observational data. All trends with a minimum length of 10 years  
 95 are shown. Yellow diamonds indicate the two analysis periods used in this study (1945–2005 and 2006–  
 96 2020). The consistent sign of trends across a wide range of start–end year combinations indicates that the  
 97 identified changes are robust.

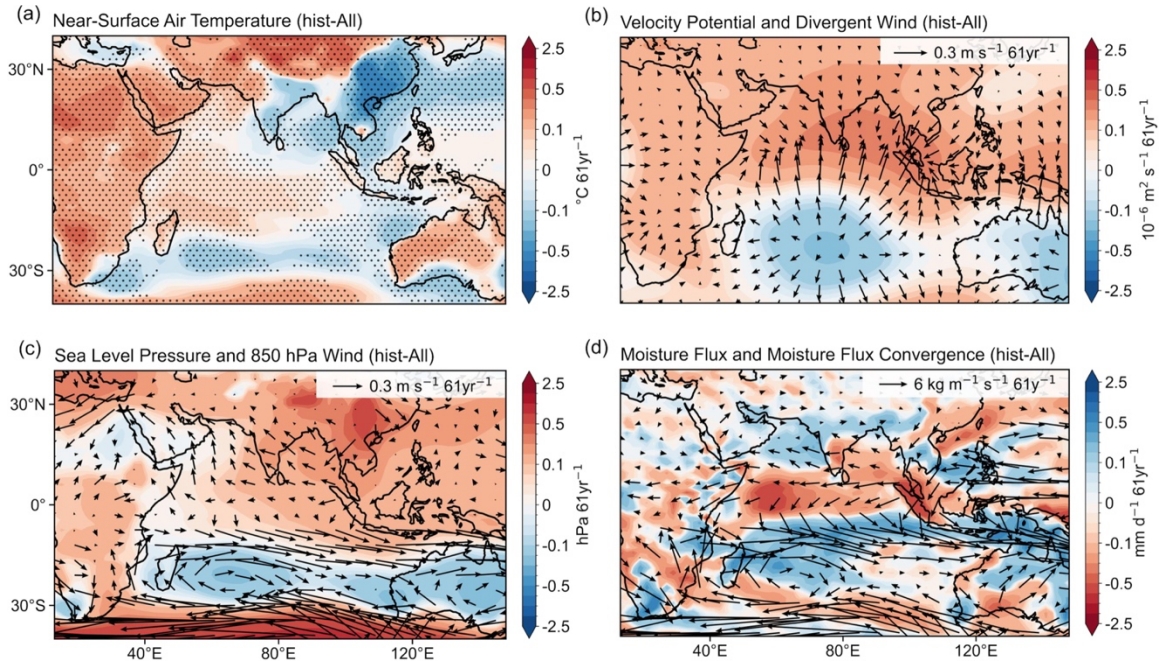

98

99 **Figure S5.** Spatial distribution of DJF trends over 1945–2005: (a) near-surface temperature relative to the  
 100 contemporaneous tropical ocean mean (25°S–25°N), (b) velocity potential (shading) with divergent wind  
 101 (vectors) at 200 hPa, (c) mean sea level pressure (shading) with 850 hPa winds (vectors), and (d) vertically  
 102 integrated moisture flux (vectors) and moisture flux convergence (shading) for the hist-All simulations. All  
 103 trends are based on the multimodel mean (MMM) across 10 CMIP6 models. Stippling indicates regions  
 104 where at least 70% of models agree on the sign of change.

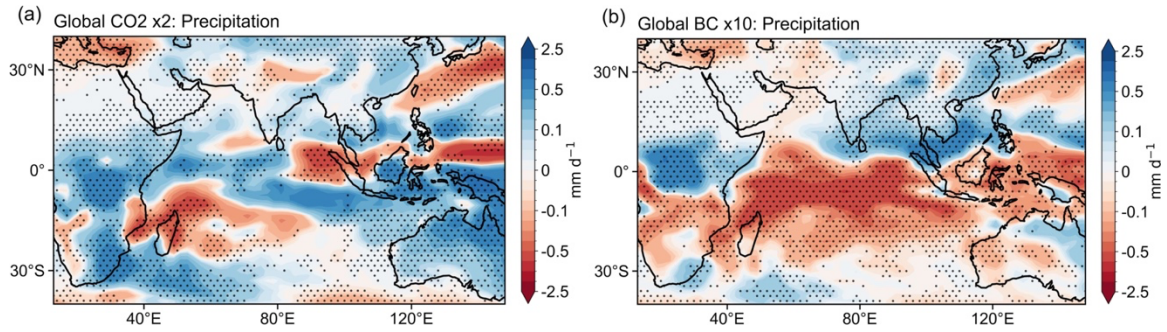

105

106

**Figure S6.** Spatial anomalies of DJF precipitation from PDRMIP experiments. Panels (a) and (b) show the total equilibrium precipitation response in the Global CO<sub>2</sub>×2 and Global BC×10 simulations, respectively.

107

Seven models were used to calculate the multimodel mean, and stippling indicates regions where at least 70%

108

of the models agree on the sign of change.

109

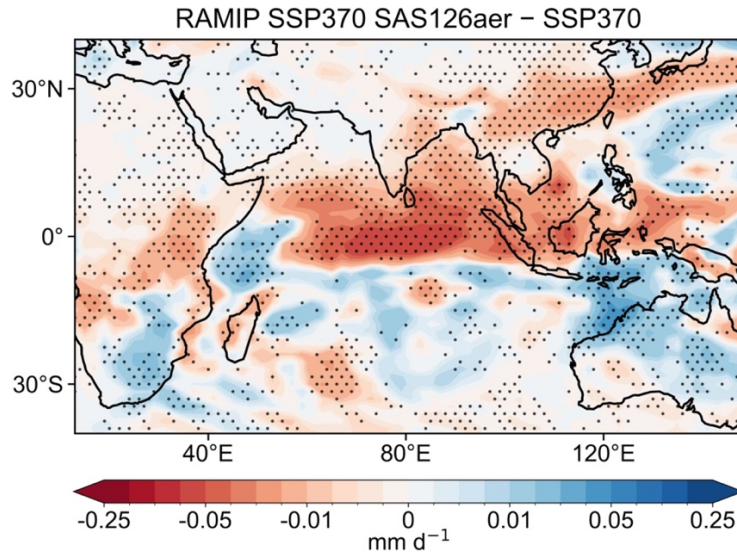

110

111 **Figure S7.** Spatial distribution of DJF mean precipitation changes over 2035–2049 from RAMIP simulations, shown as the  
 112 MMM across 10 models (100 ensemble members). Results are defined as the difference between the South Asian perturbation  
 113 (SSP370-SAS126aer) and the baseline simulation (SSP370). As aerosol emissions over SAS have shown only a modest  
 114 increase in recent decades—substantially smaller than the perturbation applied in RAMIP—the simulated response is rescaled  
 115 (sign –of 5) to better approximate observed changes. Stippling indicates regions where at least 70% of models agree on the  
 116 sign of change.
